# Supplementary material
Source: PubMed Central journal article supplement (PMC3046228)
Supplement: NIHMS264945-supplement-1_si_001.pdf [file NIHMS264945-supplement-1_si_001.pdf]

## Supporting Information

# PHOENIX: A Scoring Function Derived Using High-Resolution Crystal Structures and Calorimetry Measurements To Predict Binding Affinities of Protein-Ligand Complexes

Yat T. Tang and Garland R. Marshall

## 1 Metrics for X-ray Crystal Structure Quality

- Free R Value ( $R_{free}$ )

Free R Value ( $R_{free}$ ) is a measure of the degree to which an atomic model predicts a subset of observed diffraction data that has been omitted from the refinement.  $R_{free}$  is defined by the equation:

$$R_{free} = \frac{\sum |F_{obs} - F_{calc}|}{\sum |F_{obs}|} \quad (1)$$

$F_{obs}$  = the observed reflection amplitudes,

$F_{calc}$  = the reflection amplitudes calculated from the model.

- Diffraction-component Precision Index (DPI)

DPI is measure of the quality of the structural model derived from the diffraction data. DPI is defined by the equation:

$$\sigma(x, B_{avg}) = 1.28 N_{atoms}^{1/2} V_a^{1/3} N_{obs}^{-5/6} R_{free}, \quad (2)$$

$N_{atoms}$  = number of atoms in the unit cell,  
 $V_a$  = volume of unit cell,  
 $N_{obs}$  = number of crystallographic observations.

## 2 Metrics for Partial Least Squares Models

- Correlation Coefficient ( $r^2$ )

$$r^2 = 1 - \frac{\sum_i (X_{i,pred} - X_{i,exp})^2}{\sum_i (X_{i,exp} - X_{i,mean})^2} \quad (3)$$

$X_{pred}$  = predicted thermodynamic parameter,  
 $X_{exp}$  = experimentally measured thermodynamic parameter,  
 $X_{mean}$  = mean of experimentally measured thermodynamic parameter.

- Standard Error (s)

$$s = \sqrt{\frac{\sum_i (X_{i,pred} - X_{i,exp})^2}{(N - 1)}} \quad (4)$$

$X_{pred}$  = predicted thermodynamic parameter,  
 $X_{exp}$  = experimentally measured thermodynamic parameter,  
 $N$  = number of thermodynamic parameters.

- F-value (F)

$$F = \frac{r^2(N - k - 1)}{(1 - r^2)k} \quad (5)$$

$r$  = Pearson correlation coefficient,  
 $N$  = training set size,  
 $k$  = number of PLS components used.

- Cross-validation Correlation Coefficient ( $q^2$ )

$$q^2 = 1 - \frac{\sum_i (X_{i,pred} - X_{i,exp})^2}{\sum_i (X_{i,exp} - X_{i,mean})^2} \quad (6)$$

$X_{pred}$  = predicted thermodynamic parameter,  
 $X_{exp}$  = experimentally measured thermodynamic parameter,  
 $X_{mean}$  = mean of experimentally measured thermodynamic parameter.

- Cross-validation Standard Error ( $S_{PRESS}$ )

$$S_{PRESS} = \sqrt{\frac{\sum_i (X_{i,pred} - X_{i,exp})^2}{(N - k - 1)}} \quad (7)$$

$X_{pred}$  = predicted thermodynamic parameter,  
 $X_{exp}$  = experimentally measured thermodynamic parameter,  
 $N$  = number of thermodynamic parameters,  
 $k$  = number of PLS components used.

- Predictive Correlation Coefficient ( $r_{pred}^2$ )

$$r_{pred}^2 = 1 - \frac{\sum_i (X_{i,pred} - X_{i,exp})^2}{\sum_i (X_{i,exp} - X_{i,mean})^2} \quad (8)$$

$X_{pred}$  = predicted thermodynamic parameter,  
 $X_{exp}$  = experimentally measured thermodynamic parameter,  
 $X_{mean}$  = mean of experimentally measured thermodynamic parameter.

- Predictive Standard Error ( $SE_{pred}$ )

$$SE_{pred} = \sqrt{\frac{\sum_i (X_{i,pred} - X_{i,exp})^2}{(N - 1)}} \quad (9)$$

$X_{pred}$  = predicted thermodynamic parameter,  
 $X_{exp}$  = experimentally measured thermodynamic parameter,  
 $N$  = number of thermodynamic parameters.

### 3 Metrics for Correlation Evaluations

- Pearson Correlation Coefficient ( $R_P$ )

$$R_P = 1 - \frac{\sum_i (x_i - \bar{x})(y_i - \bar{y})}{\sqrt{\sum_i (x_i - \bar{x})^2} \sqrt{\sum_i (y_i - \bar{y})^2}} \quad (10)$$

- Spearman Correlation Coefficient ( $R_S$ )

$$R_S = 1 - \frac{6 \times \sum_i (R_i - S_i)^2}{n(n^2 - 1)} \quad (11)$$

$R_i$  = experimentally measured rank,  
 $S_i$  = predicted rank,  
 $n$  = number of values.

- Standard Deviaton (SD)

$$SD = \sqrt{\sum_i [y_i - (ax_i + b)]^2 / (N - 2)} \quad (12)$$

$a$  = slope of regression line,  
 $b$  = coefficient of regression line,  
 $N$  = number of values.

- Mean Error (ME)

$$ME = \sum_i |y_i - (ax_i + b)| / N \quad (13)$$

$a$  = slope of regression line,  
 $b$  = coefficient of regression line,  
 $N$  = number of values.

## 4 Supporting Tables

| PDB  | Res.(Å) | R <sub>free</sub> | DPI  | $\Delta G$ | $\Delta H$ | T $\Delta S$ |
|------|---------|-------------------|------|------------|------------|--------------|
| 1a30 | 2       | 0.23              | 0.28 | -6.34      | -3.6       | 2.74         |
| 1adl | 1.6     | 0.22              | 0.17 | -7.38      | -6.77      | 0.6          |
| 1anf | 1.67    | na                | na   | -7.08      | 6.24       | 13.31        |
| 1ax0 | 1.9     | 0.2               | 0.16 | -4.28      | -5.49      | -1.22        |
| 1ax1 | 1.95    | 0.2               | 0.18 | -4.49      | -9.84      | -5.37        |
| 1ax2 | 1.95    | 0.18              | 0.16 | -5.42      | -11.25     | -5.93        |
| 1b05 | 2       | 0.24              | 0.25 | -9.7       | 1.89       | 11.51        |
| 1b0h | 1.9     | 0.22              | 0.21 | -9.12      | 4.97       | 14.09        |
| 1b1h | 1.8     | 0.22              | 0.18 | -9.63      | 1.72       | 11.32        |
| 1b2h | 1.9     | 0.22              | 0.21 | -6.19      | 16.58      | 22.78        |
| 1b32 | 1.75    | 0.21              | 0.16 | -9.67      | 3.49       | 13.11        |
| 1b3f | 1.8     | 0.22              | 0.18 | -9.39      | 4.92       | 14.28        |
| 1b3g | 2       | 0.24              | 0.25 | -9.15      | 4.9        | 14           |
| 1b3h | 2       | 0.24              | 0.26 | -8.46      | 4.87       | 13.52        |
| 1b3l | 2       | 0.24              | 0.34 | -8.03      | 3.37       | 11.35        |
| 1b46 | 1.8     | 0.22              | 0.16 | -7.19      | 3.96       | 11.11        |
| 1b4h | 1.9     | 0.23              | 0.21 | -7.43      | 10.6       | 18.01        |
| 1b4z | 1.75    | 0.21              | 0.16 | -7.12      | 1.93       | 90.19        |
| 1b51 | 1.8     | 0.22              | 0.24 | -10.03     | 2.13       | 12.09        |
| 1b58 | 1.8     | 0.22              | 0.26 | -8.96      | 4.94       | 13.83        |

Table 1: The final training set (n = 112) (1 of 6) used in the PHOENIX scoring function. Protein Data Bank code (PDB), crystal structure quality metrics (nominal resolution (Res.), free R value (R<sub>free</sub>), diffraction-component precision index (DPI)), and ITC determined thermodynamic parameters (change in binding free energy ( $\Delta G$ ), change in enthalpy ( $\Delta H$ ), and change in entropy (T  $\Delta S$ )) (kcal/mol) for each complex are listed.

| PDB  | Res.(Å) | $R_{free}$ | DPI  | $\Delta G$ | $\Delta H$ | $T\Delta S$ |
|------|---------|------------|------|------------|------------|-------------|
| 1b5h | 1.9     | 0.23       | 0.22 | -8.19      | 10.68      | 18.86       |
| 1b5i | 1.9     | 0.22       | 0.23 | -9.6       | 1.84       | 11.44       |
| 1b5j | 1.8     | 0.23       | 0.19 | -10.13     | 2.72       | 12.75       |
| 1b6h | 1.8     | 0.22       | 0.2  | -10.68     | 1.89       | 12.53       |
| 1b7h | 2       | 0.26       | 0.28 | -11.01     | 4.68       | 15.66       |
| 1b9j | 1.8     | 0.22       | 0.18 | -8.1       | 5.88       | 13.92       |
| 1bbz | 1.65    | 0.27       | 0.04 | -7.7       | -21.9      | -14.2       |
| 1bkj | 1.8     | 0.21       | 0.16 | -9.3       | -21.5      | -12.2       |
| 1dzk | 1.48    | 0.24       | 0.12 | -9.2       | -23.22     | -14.02      |
| 1e4w | 1.95    | 0.27       | 0.25 | -10.3      | -26.7      | -16.4       |
| 1e4x | 1.9     | 0.31       | 0.31 | -10.3      | -24.8      | -14.5       |
| 1g6s | 1.5     | 0.17       | 0.1  | -9.37      | -19        | -9.57       |
| 1g6t | 1.6     | 0.19       | 0.12 | -6.86      | -5.2       | 1.62        |
| 1gic | 2       | na         | na   | -5.5       | -4.5       | -0.11       |
| 1gz9 | 1.7     | 0.24       | 0.17 | -4.78      | -4.71      | 0.07        |
| 1gzc | 1.58    | 0.23       | 0.14 | -4.76      | -7.15      | -2.39       |
| 1hpb | 1.9     | na         | na   | -12.6      | -7.3       | 5.3         |
| 1hpx | 2       | na         | na   | -13.3      | -5.4       | 7.9         |
| 1hsg | 2       | na         | na   | -12.7      | 2.1        | 14.8        |
| 1hw5 | 1.82    | 0.3        | 0.07 | -6.78      | -0.98      | 5.82        |

Table 2: The final training set ( $n = 112$ ) (2 of 6) used in the PHOENIX scoring function. Protein Data Bank code (PDB), crystal structure quality metrics (nominal resolution (Res.), free R value ( $R_{free}$ ), diffraction-component precision index (DPI)), and ITC determined thermodynamic parameters (change in binding free energy ( $\Delta G$ ), change in enthalpy ( $\Delta H$ ), and change in entropy ( $T \Delta S$ )) (kcal/mol) for each complex are listed.

| PDB  | Res.(Å) | R <sub>free</sub> | DPI  | $\Delta G$ | $\Delta H$ | T $\Delta S$ |
|------|---------|-------------------|------|------------|------------|--------------|
| 1hwx | 1.8     | na                | na   | -13.63     | -2.5       | 11.1         |
| 1i06 | 1.9     | 0.25              | 0.27 | -8.38      | -11.2      | -2.78        |
| 1i82 | 1.9     | 0.24              | 0.03 | -8.01      | -11.07     | -3.06        |
| 1i8a | 1.9     | 0.22              | 0.04 | -4.83      | -7.45      | -2.72        |
| 1is0 | 1.9     | 0.27              | 0.04 | -9.55      | -5.91      | 5.07         |
| 1jet | 1.2     | 0.26              | 0.08 | -9.82      | 4.8        | 14.59        |
| 1jeu | 1.25    | 0.25              | 0.08 | -9.29      | 2.7        | 11.94        |
| 1jev | 1.3     | 0.23              | 0.08 | -9.36      | 7          | 16.29        |
| 1jyr | 1.55    | 0.23              | 0.17 | -9.12      | -7.94      | 1.18         |
| 1k1n | 2       | na                | na   | -9.15      | -5.9       | 2.53         |
| 1k21 | 1.86    | 0.26              | 0.23 | -11.42     | -13.81     | -2.39        |
| 1k22 | 1.93    | 0.21              | 0.21 | -11.44     | -8.84      | 2.6          |
| 1kjl | 1.4     | 0.22              | 0.11 | -5.6       | -9.6       | -4           |
| 1lcj | 1.8     | na                | na   | -9.58      | -9.24      | 0.33         |
| 1lid | 1.6     | na                | na   | -7.77      | -6.05      | 1.72         |
| 1lzb | 1.5     | na                | na   | -7         | -14.1      | -7.1         |
| 1mk5 | 1.4     | 0.19              | 0.11 | -18        | -24.9      | -6.6         |
| 1ndc | 2       | na                | na   | -4.68      | -3.2       | 1.5          |
| 1nzl | 1.9     | 0.27              | 0.25 | -9.7       | -7         | 2.7          |
| 1qka | 1.8     | 0.22              | 0.19 | -8.07      | 8.6        | 16.65        |

Table 3: The final training set (n = 112) (3 of 6) used in the PHOENIX scoring function. Protein Data Bank code (PDB), crystal structure quality metrics (nominal resolution (Res.), free R value (R<sub>free</sub>), diffraction-component precision index (DPI)), and ITC determined thermodynamic parameters (change in binding free energy ( $\Delta G$ ), change in enthalpy ( $\Delta H$ ), and change in entropy (T  $\Delta S$ )) (kcal/mol) for each complex are listed.

| PDB  | Res.(Å) | $R_{free}$ | DPI  | $\Delta G$ | $\Delta H$ | $T\Delta S$ |
|------|---------|------------|------|------------|------------|-------------|
| 1qkb | 1.8     | 0.22       | 0.17 | -10.01     | 5.35       | 15.36       |
| 1qy1 | 1.7     | 0.21       | 0.19 | -8.1       | -10.64     | -2.54       |
| 1qy2 | 1.75    | 0.21       | 0.19 | -9.2       | -11.44     | -2.24       |
| 1rst | 1.7     | 0.23       | 0.26 | -6.071     | -12.559    | -6.49       |
| 1s0r | 1.02    | 0.14       | 0.03 | -6.35      | -4.51      | 1.84        |
| 1s3z | 2       | 0.21       | 0.24 | -8.3       | -19.9      | -11.6       |
| 1slt | 1.9     | na         | na   | -5.47      | -7.76      | -2.29       |
| 1sre | 1.78    | na         | na   | -5.27      | 1.7        | 6.97        |
| 1srg | 1.8     | na         | na   | -7.23      | 1.28       | 8.51        |
| 1sri | 1.65    | na         | na   | -8.29      | 2.15       | 10.44       |
| 1t3r | 1.2     | 0.18       | 0.06 | -15.2      | -12.1      | 3.1         |
| 1t7i | 1.35    | 0.2        | 0.09 | -13.7      | -10        | 3.7         |
| 1uae | 1.8     | na         | na   | -6         | 6.88       | 12.87       |
| 1w19 | 2       | 0.19       | 0.22 | -7.82      | -12.72     | -4.9        |
| 1w3j | 2       | 0.26       | 0.28 | -8.61      | -11.15     | -2.52       |
| 1y93 | 1.03    | 0.17       | 0.06 | -3.01      | -3.18      | -0.17       |
| 1yon | 1.95    | 0.21       | 0.19 | -5.8       | -3.01      | 2.79        |
| 1yp6 | 1.8     | 0.22       | 0.22 | -8.43      | -7.51      | 0.92        |
| 1yv5 | 2       | 0.25       | 0.3  | -8.8       | 1.8        | 10.5        |
| 1znk | 1.6     | 0.26       | 0.19 | -9.27      | -15.19     | -5.92       |

Table 4: The final training set ( $n = 112$ ) (4 of 6) used in the PHOENIX scoring function. Protein Data Bank code (PDB), crystal structure quality metrics (nominal resolution (Res.), free R value ( $R_{free}$ ), diffraction-component precision index (DPI)), and ITC determined thermodynamic parameters (change in binding free energy ( $\Delta G$ ), change in enthalpy ( $\Delta H$ ), and change in entropy ( $T \Delta S$ )) (kcal/mol) for each complex are listed.



| PDB  | Res.(Å) | R <sub>free</sub> | DPI  | $\Delta G$ | $\Delta H$ | T $\Delta S$ |
|------|---------|-------------------|------|------------|------------|--------------|
| 2a2r | 1.4     | 0.21              | 0.1  | -11.6      | -29.9      | -18.3        |
| 2aqu | 2       | 0.24              | 0.34 | -15        | -4.6       | 10.4         |
| 2bba | 1.65    | 0.19              | 0.15 | -9.8       | -15.5      | -5.7         |
| 2c92 | 1.6     | 0.22              | 0.14 | -7.88      | -15.14     | -7.27        |
| 2c94 | 1.9     | 0.22              | 0.22 | -9.45      | -9.83      | -0.38        |
| 2c97 | 2       | 0.22              | 0.25 | -8.52      | -10.52     | -2           |
| 2dm6 | 2       | 0.22              | 0.2  | -5.4       | -20.2      | -14.8        |
| 2dqt | 1.8     | 0.25              | 0.22 | -13.46     | -9.31      | 4.15         |
| 2dqu | 1.7     | 0.25              | 0.17 | -13.46     | -9.31      | 4.15         |
| 2flh | 1.2     | 0.19              | 0.08 | -5.323     | -3.27      | 2.04         |
| 2fqw | 1.71    | 0.21              | 0.17 | -8.95      | -10.3      | -1.38        |
| 2fqx | 1.7     | 0.22              | 0.18 | -9.58      | -12.6      | -3.05        |
| 2fgy | 1.9     | 0.23              | 0.24 | -8.81      | -12.9      | -4.07        |
| 2gud | 0.94    | 0.16              | 0.02 | -5.53      | -0.081     | 5.45         |
| 2h2d | 1.7     | 0.24              | 0.16 | -7.36      | -5.02      | 2.3          |
| 2h2g | 1.63    | 0.23              | 0.14 | -6.87      | -5.91      | 0.961        |
| 2hyq | 2       | 0.24              | 0.3  | -5.65      | -0.072     | 5.58         |
| 2hyr | 1.51    | 0.19              | 0.11 | -4.72      | -0.048     | 4.67         |
| 2ikg | 1.43    | 0.2               | 0.09 | -8.46      | -6.11      | 2.34         |
| 2ikh | 1.55    | 0.21              | 0.11 | -7.48      | -2.08      | 5.4          |

Table 5: The final training set ( $n = 112$ ) (5 of 6) used in the PHOENIX scoring function. Protein Data Bank code (PDB), crystal structure quality metrics (nominal resolution (Res.), free R value (R<sub>free</sub>), diffraction-component precision index (DPI)), and ITC determined thermodynamic parameters (change in binding free energy ( $\Delta G$ ), change in enthalpy ( $\Delta H$ ), and change in entropy (T  $\Delta S$ )) (kcal/mol) for each complex are listed.

| PDB  | Res.(Å) | R <sub>free</sub> | DPI  | $\Delta G$ | $\Delta H$ | T $\Delta S$ |
|------|---------|-------------------|------|------------|------------|--------------|
| 2iki | 1.47    | 0.18              | 0.09 | -10.2      | -14.83     | -4.63        |
| 2ikj | 1.55    | 0.21              | 0.12 | -10.08     | -18.89     | -8.81        |
| 2iko | 1.9     | 0.23              | 0.28 | -7.5       | -9.5       | -2           |
| 2o4k | 1.6     | 0.21              | 0.13 | -14.3      | -4.2       | 10.1         |
| 2o4l | 1.33    | 0.22              | 0.1  | -12.5      | -4.3       | 8.2          |
| 2o4n | 2       | 0.23              | 0.24 | -10.6      | -3.6       | 6.9          |
| 2o4p | 1.8     | 0.23              | 0.19 | -14.6      | -0.7       | 13.9         |
| 2o4s | 1.54    | 0.22              | 0.13 | -14.3      | -2.4       | 11.9         |
| 2olb | 1.4     | na                | na   | -7.55      | 9.41       | 16.91        |
| 3mbp | 1.7     | na                | na   | -7.23      | 4.87       | 12.09        |
| 6gss | 1.9     | 0.22              | 0.22 | -5.53      | -11.21     | -5.65        |
| 9gss | 1.97    | 0.23              | 0.14 | -8.04      | -16.13     | -8.04        |

Table 6: The final training set (n = 112) (6 of 6) used in the PHOENIX scoring function. Protein Data Bank code (PDB), crystal structure quality metrics (nominal resolution (Res.), free R value (R<sub>free</sub>), diffraction-component precision index (DPI)), and ITC determined thermodynamic parameters (change in binding free energy ( $\Delta G$ ), change in enthalpy ( $\Delta H$ ), and change in entropy (T  $\Delta S$ )) (kcal/mol) for each complex are listed.

| Abbreviation | Description                                                      |
|--------------|------------------------------------------------------------------|
| EIE          | Electrostatic Interaction Energy                                 |
| SIE          | Steric Interaction Energy                                        |
| SF           | Steric Fit                                                       |
| RB           | Rotatable Bonds                                                  |
| LSE          | Ligand Strain Energy                                             |
| LLCSA1       | Hydrophobic/Hydrophobic Contact Surface Area 1                   |
| HHCSA1OC     | Hydrophilic/Hydrophilic Contact Surface Area 1 (Opposite Charge) |
| LHCSA1       | Hydrophobic/Hydrophilic Contact Surface Area 1                   |
| LHCSA1SC     | Hydrophilic/Hydrophilic Contact Surface Area 1 (Same Charge)     |
| LLCSA2       | Hydrophobic/Hydrophobic Contact Surface Area 2                   |
| HHCSA2OC     | Hydrophilic/Hydrophilic Contact Surface Area 2 (Opposite Charge) |
| LHCSA2       | Hydrophobic/Hydrophilic Contact Surface Area 2                   |
| HHCSA2SC     | Hydrophilic/Hydrophilic Contact Surface Area 2 (Same Charge)     |
| LTLA         | Ligand Total Hydrophobic Surface Area                            |
| LTHSA        | Ligand Total Hydrophilic Surface Area                            |
| FI           | Flexibility Index(Rot Bonds/ Non Term Bonds)                     |

Table 7: List of the 42 descriptors (1 of 2) used in the final PHOENIX scoring function to derive equations to estimate the thermodynamic parameters.

| Abbreviation      | Description                                        |
|-------------------|----------------------------------------------------|
| LBLSA             | Ligand Buried Hydrophobic Surface Area             |
| LBHSA             | Ligand Buried Hydrophilic Surface Area             |
| LELSA             | Ligand Exposed Hydrophobic Surface Area            |
| LEHSA             | Ligand Exposed Hydrophilic Surface Area            |
| RBLSA             | Receptor Buried Hydrophobic Surface Area           |
| RBHSA             | Receptor Buried Hydrophilic Surface Area           |
| RELSA             | Receptor Exposed Hydrophobic Surface Area          |
| REHSA             | Receptor Exposed Hydrophilic Surface Area          |
| NLBLSA            | Normalized Ligand Buried Hydrophobic Surface Area  |
| NLBHSA            | Normalized Ligand Buried Hydrophilic Surface Area  |
| NLELSA            | Normalized Ligand Exposed Hydrophobic Surface Area |
| NLEHSA            | Normalized Ligand Exposed Hydrophilic Surface Area |
| TLRHB             | Total Ligand/Receptor Hydrogen Bonds               |
| LTDAC             | Ligand Total Donor/Acceptor Count                  |
| LTHBA             | Ligand Total Hydrogen Bond Atoms                   |
| LTBDAC            | Ligand Total Buried Donor/Acceptor Count           |
| RTDAC             | Receptor Total Donor/Acceptor Count                |
| RTBDAC            | Receptor Total Buried Donor/Acceptor Count         |
| XLOGP             | Partition Coefficient                              |
| LIG_VOL           | Ligand Volume                                      |
| POCK_VOL          | Pocket Volume                                      |
| NB_AS             | Number of Alpha Spheres                            |
| APOL_AS_PROP      | Proportion of Apolar Alpha Spheres                 |
| MEAN_LOC_HYD_DENS | Mean Local Hydrophobic Density                     |
| POL_SCORE         | Polarity Score                                     |
| AS_DENSITY        | Alpha Sphere Density                               |

Table 8: List of the 42 descriptors (2 of 2) used in the final PHOENIX scoring function to derive equations to estimate the thermodynamic parameters.
